# Supplementary material for: Chromosome organization by one-sided and two-sided loop extrusion
Source: eLife journal article supplement (doi:10.7554/elife.53558), 2020-04-06
Supplement: supp [file elife-53558-supp-v1.zip]

Archive with 24 entries (24 files):
- elife_poa_e53558_Figure_2_figure_supplement_2.pdf
- elife_poa_e53558_Figure_3_figure_supplement_4.pdf
- elife_poa_e53558_Figure_3_figure_supplement_1.pdf
- elife_poa_e53558_Figure_2_figure_supplement_5.pdf
- elife_poa_e53558_Figure_2_figure_supplement_1.pdf
- elife_poa_e53558_Figure_3_figure_supplement_2.pdf
- elife_poa_e53558_Figure_3_figure_supplement_6.pdf
- elife_poa_e53558_Figure_4_figure_supplement_6.pdf
- elife_poa_e53558_Figure_4_figure_supplement_4.pdf
- elife_poa_e53558_Figure_2_figure_supplement_3.pdf
- elife_poa_e53558_Figure_4_figure_supplement_3.pdf
- elife_poa_e53558_Figure_4_figure_supplement_2.pdf
- elife_poa_e53558_Figure_4_figure_supplement_8.pdf
- elife_poa_e53558_Figure_4_figure_supplement_7.pdf
- elife_poa_e53558_Figure_3_figure_supplement_7.pdf
- elife_poa_e53558_Figure_4_figure_supplement_1.pdf
- elife_poa_e53558_Figure_3_figure_supplement_3.pdf
- elife_poa_e53558_Transparent_Reporting_File.docx
- elife_poa_e53558_Figure_3_figure_supplement_8.pdf
- elife_poa_e53558_Figure_4_figure_supplement_5.pdf
- elife_poa_e53558_Figure_3_figure_supplement_5.pdf
- elife_poa_e53558_Figure_2_figure_supplement_6.pdf
- elife_poa_e53558_Figure_2_figure_supplement_7.pdf
- elife_poa_e53558_Figure_3_figure_supplement_4.pdf
