# Supplementary material for: Chromosome organization by one-sided and two-sided loop extrusion
Source: eLife journal article supplement (doi:10.7554/elife.53558), 2020-04-06
Supplement: supp [file elife-53558-supp-v1.zip › elife_poa_e53558_Figure_3_figure_supplement_8.pdf]

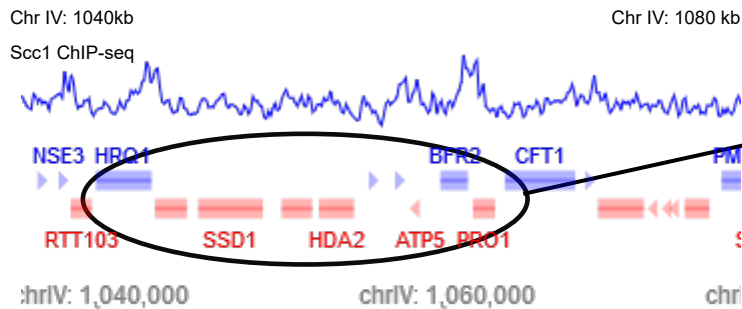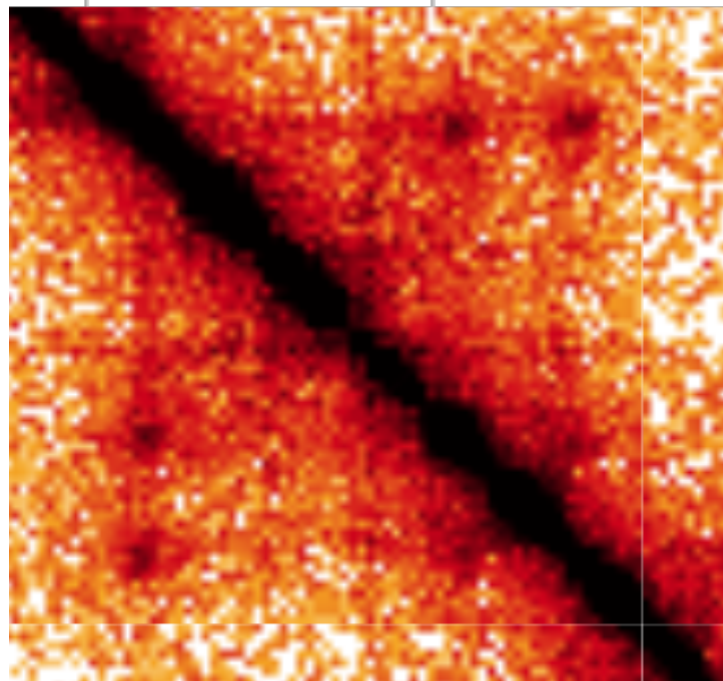

Visualization: Higlass  
Data: Ohno Cell 2019

Hypothetical trajectories for a one-sided extruder

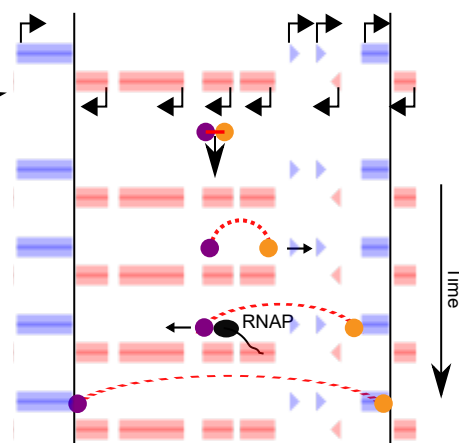

Convergent genes paired

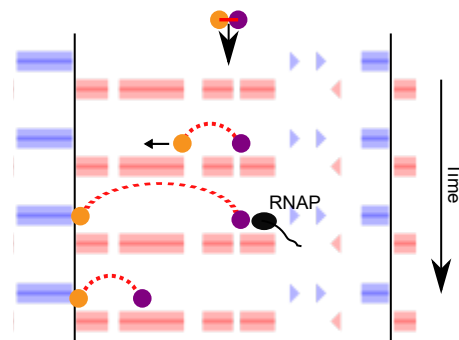

Convergent genes not paired
