# Supplementary material for: Chromosome organization by one-sided and two-sided loop extrusion
Source: eLife journal article supplement (doi:10.7554/elife.53558), 2020-04-06
Supplement: supp [file elife-53558-supp-v1.zip › elife_poa_e53558_Figure_4_figure_supplement_1.pdf]

One subunit active, one subunit diffusive model

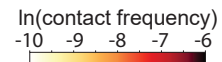

Scaled diffusion  
rate:

$v_{\text{diff}}/v = 0.005$

$v_{\text{diff}}/v = 0.1$

$v_{\text{diff}}/v = 1$

$v_{\text{diff}}/v = 3.5$

Number of extruding SMC complexes

$N = 2$

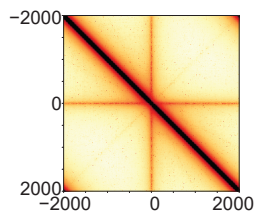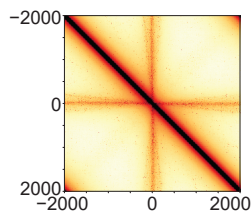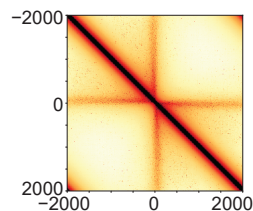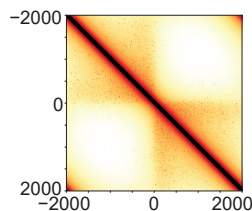

$N = 5$

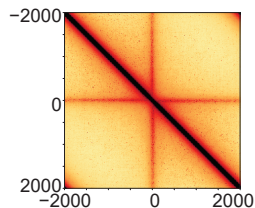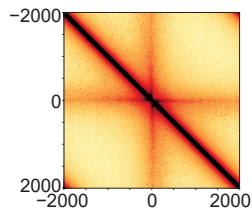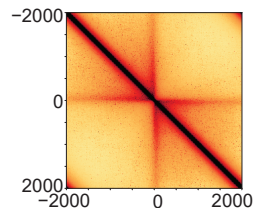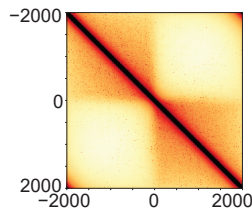

$N = 10$

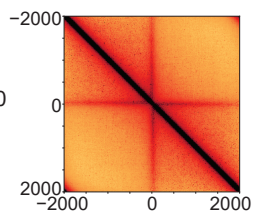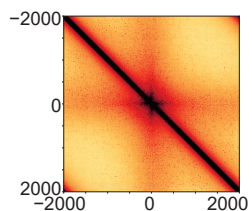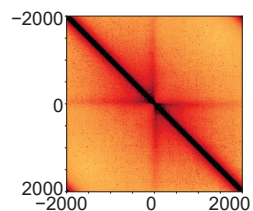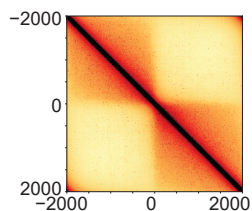

$N = 30$

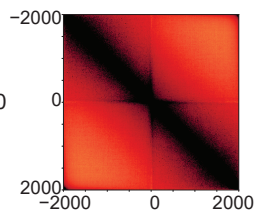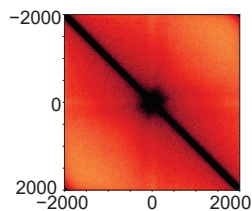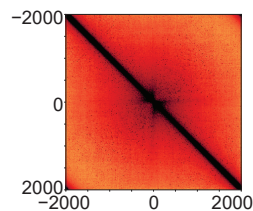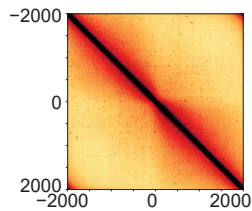

Genome position (kb)

Genome position (kb)

Genome position (kb)

Genome position (kb)
