# Supplementary material for: Chromosome organization by one-sided and two-sided loop extrusion
Source: eLife journal article supplement (doi:10.7554/elife.53558), 2020-04-06

Switching model: one subunit active, one subunit inactive

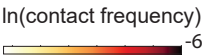

Probability  
of switching  
per LEF step:

$p = 0.001$

$p = 0.01$

$p = 0.05$

$p = 0.1$

$p = 0.5$

$N = 2$

$N = 5$

$N = 10$

$N = 30$

Genome position (kb)

Number of extruding LEFs

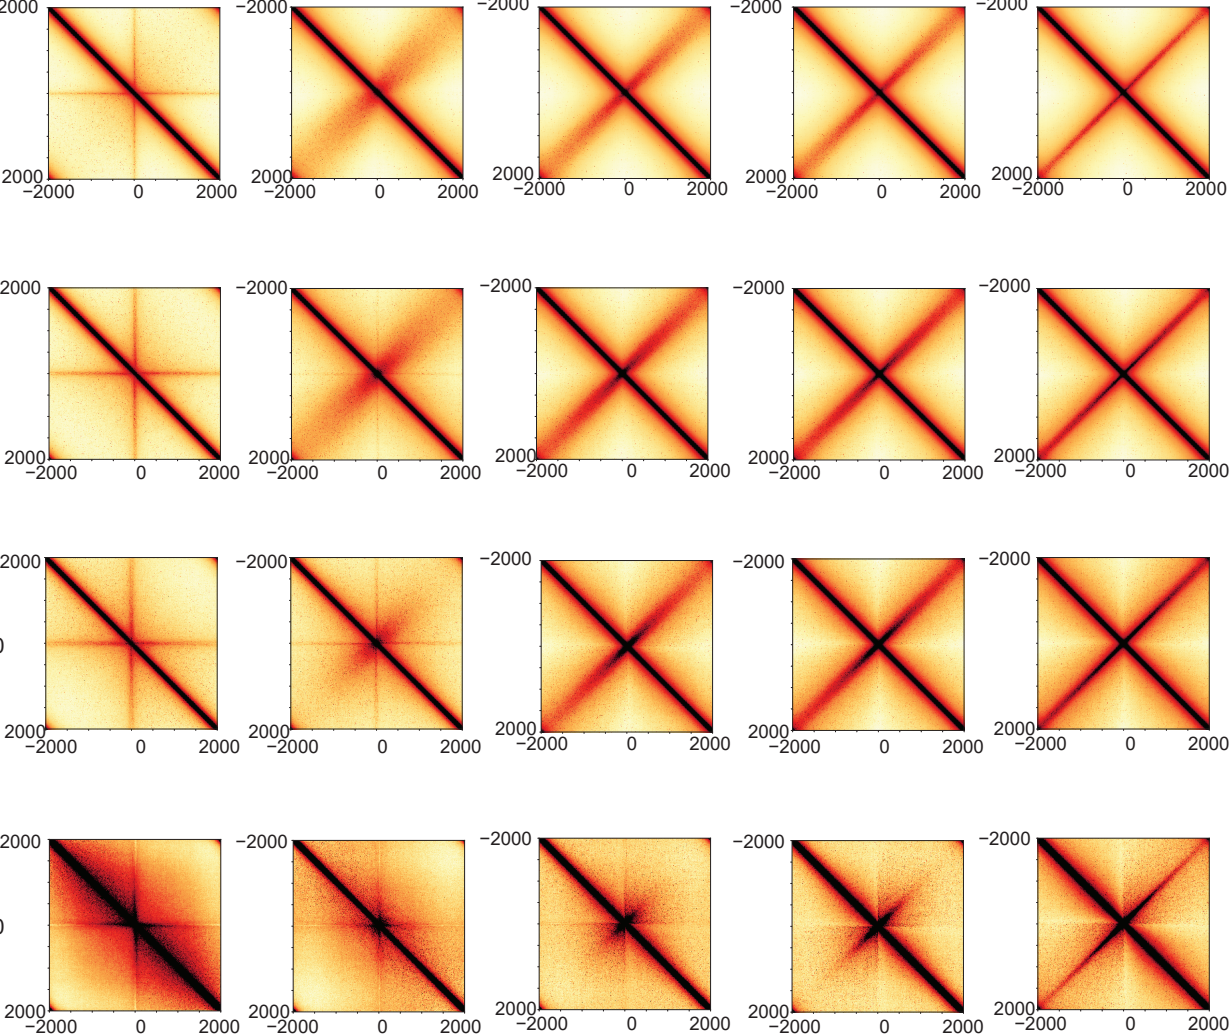

Supplement: supp [file elife-53558-supp-v1.zip › elife_poa_e53558_Figure_4_figure_supplement_2.pdf]
