# Supplementary material for: Chromosome organization by one-sided and two-sided loop extrusion
Source: eLife journal article supplement (doi:10.7554/elife.53558), 2020-04-06
Supplement: supp [file elife-53558-supp-v1.zip › elife_poa_e53558_Figure_4_figure_supplement_4.pdf]

Sweeping stepping probability (one subunit active, one subunit inactive model)

Active subunit  
step probability  
(per unit simulation time):

$p_{\text{active}} = 0.65$

$p_{\text{active}} = 0.1$

$p_{\text{active}} = 1$

$v_{\text{diff}}/v = 0.005$

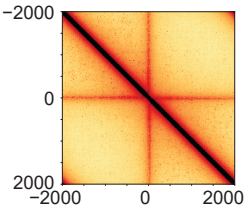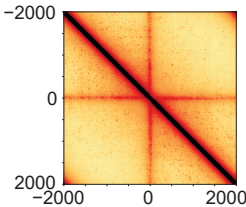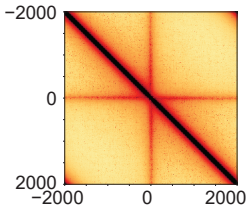

$v_{\text{diff}}/v = 0.01$

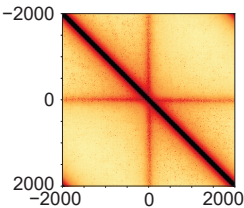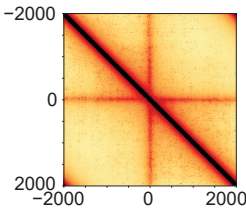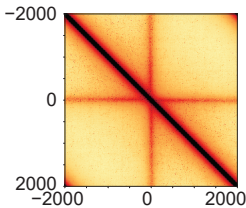

$v_{\text{diff}}/v = 0.1$

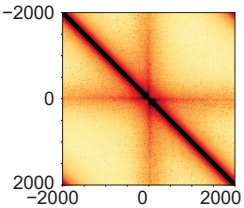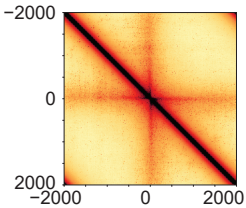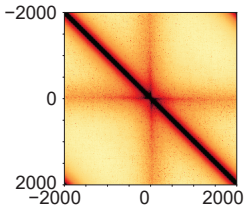

$v_{\text{diff}}/v = 0.35$

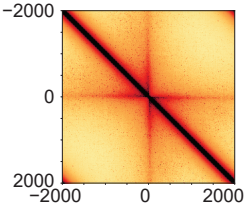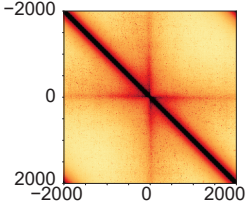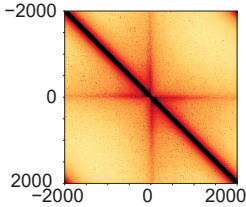

$v_{\text{diff}}/v = 1$

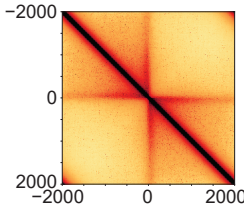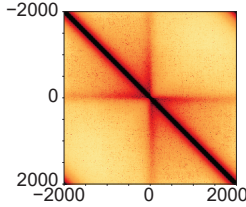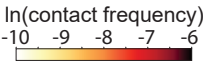

Genome position (kb)

Genome position (kb)

Genome position (kb)
