# Supplementary material for: Chromosome organization by one-sided and two-sided loop extrusion
Source: eLife journal article supplement (doi:10.7554/elife.53558), 2020-04-06
Supplement: supp [file elife-53558-supp-v1.zip › elife_poa_e53558_Figure_4_figure_supplement_6.pdf]

# Effective distances from the shortest connecting paths

$$P_c(s) \propto (s_{eff})^{-\frac{3}{2}}$$

loops of length:  $N$   
genomic distance:  $s$

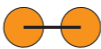 SMC loop extrusion complex

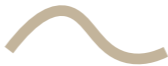 DNA fiber

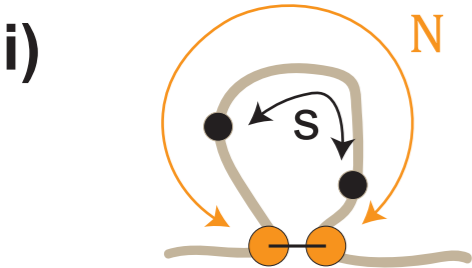

$$s_{eff} = s \left( 1 - \frac{s}{N} \right)$$

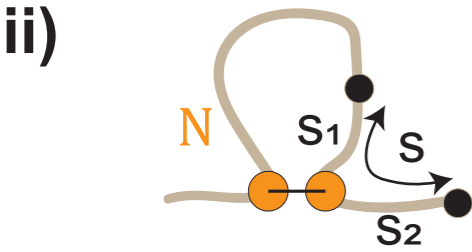

$$s_{eff} = s_1 \left( 1 - \frac{s_1}{N} \right) + s_2$$

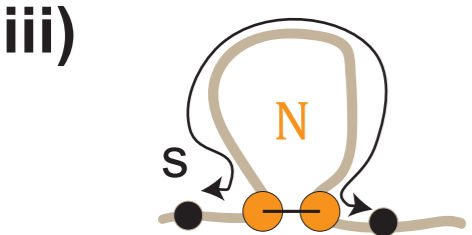

$$s_{eff} = s - N$$

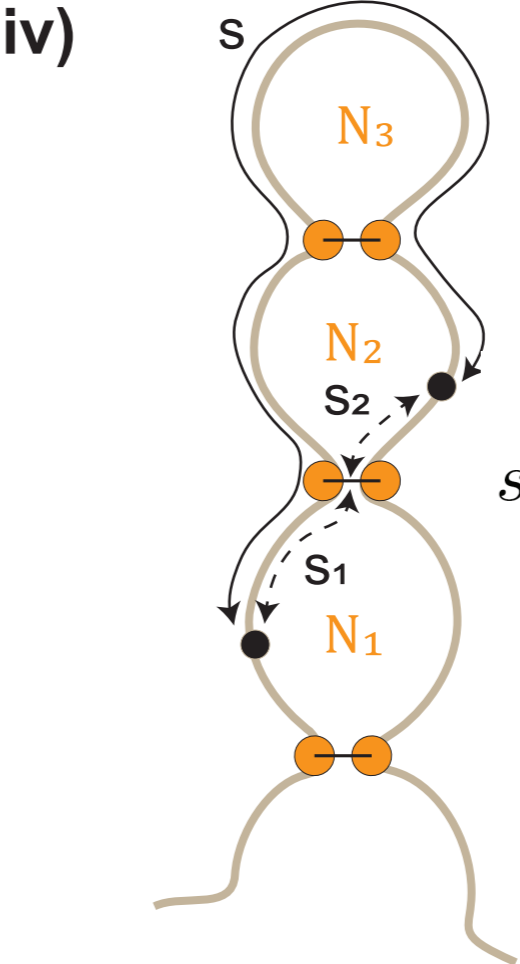

$$s_{eff} = s_1 \left( 1 - \frac{s_1}{N_1} \right) + s_2 \left( 1 - \frac{s_2}{N_2} \right)$$
