# Supplementary figures and images for: Chromosome organization by one-sided and two-sided loop extrusion
Source: eLife journal article supplement (doi:10.7554/elife.53558), 2020-04-06

## Mix of one- and two-sided

**a**

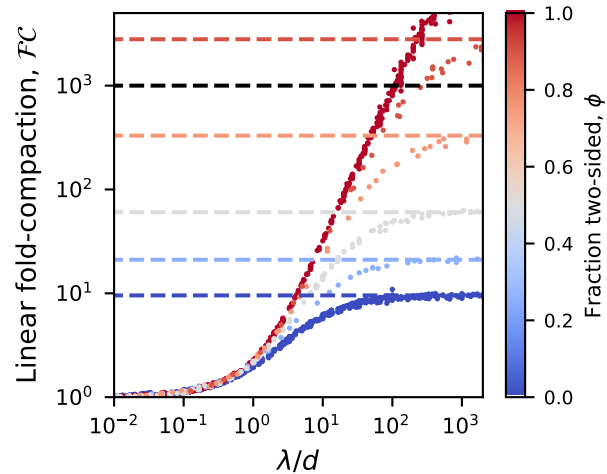

**b**

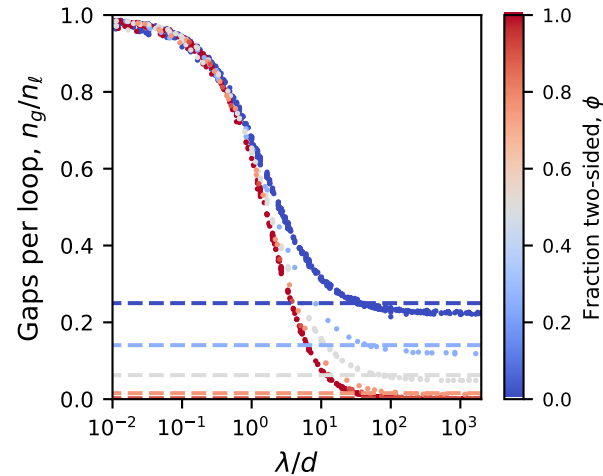

**c**

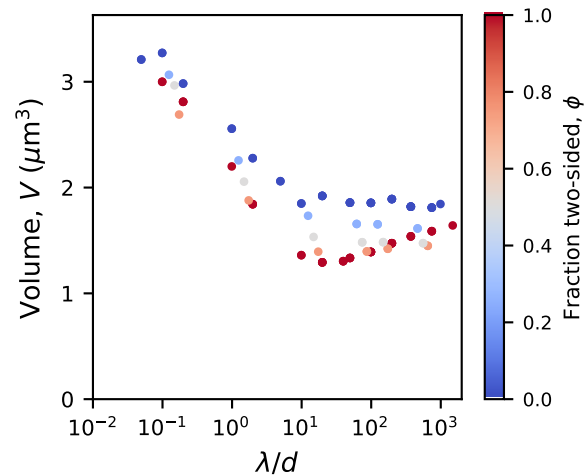

Supplement: supp [file elife-53558-supp-v1.zip › elife_poa_e53558_Figure_2_figure_supplement_2.pdf]

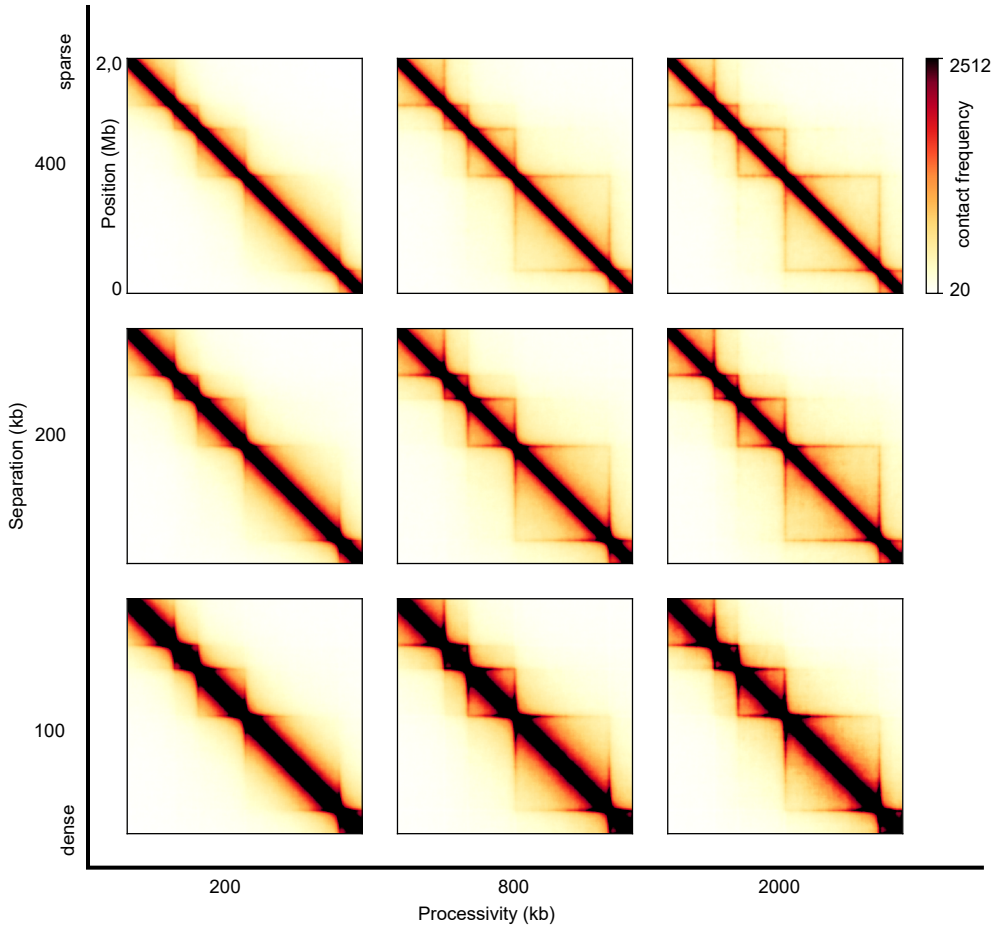

Supplement: supp [file elife-53558-supp-v1.zip › elife_poa_e53558_Figure_3_figure_supplement_4.pdf]

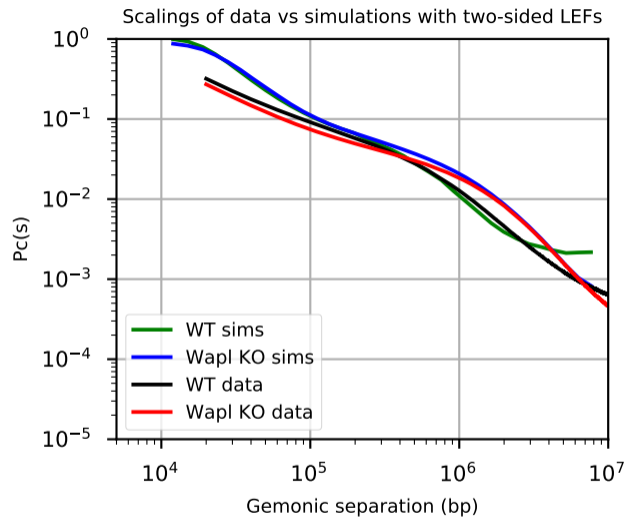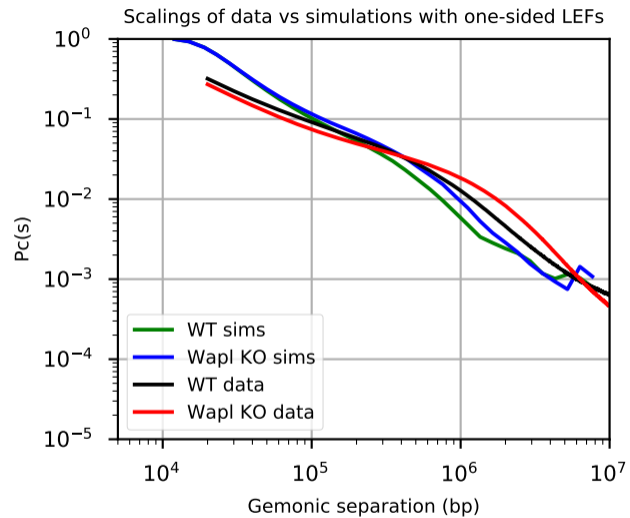

Supplement: supp [file elife-53558-supp-v1.zip › elife_poa_e53558_Figure_3_figure_supplement_1.pdf]

## Models with 3D attractions

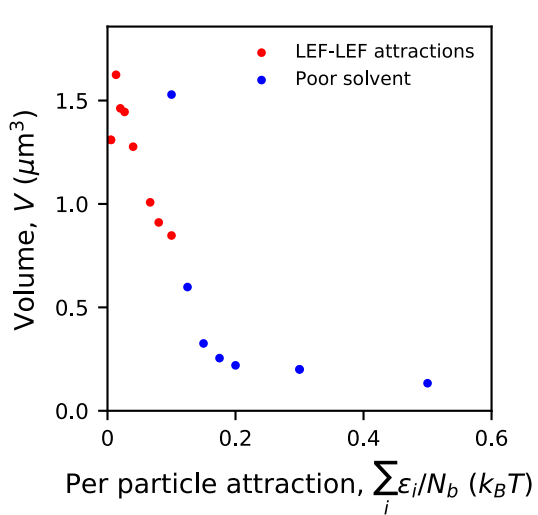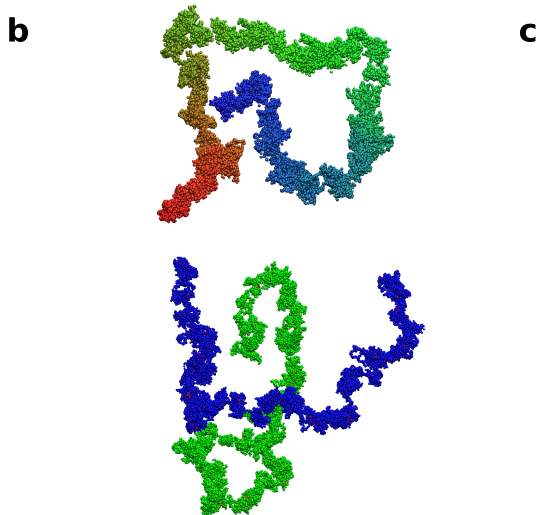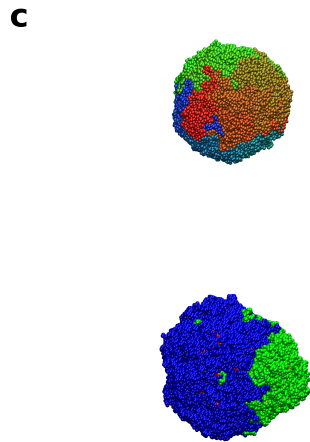

Supplement: supp [file elife-53558-supp-v1.zip › elife_poa_e53558_Figure_2_figure_supplement_5.pdf]

## Compaction

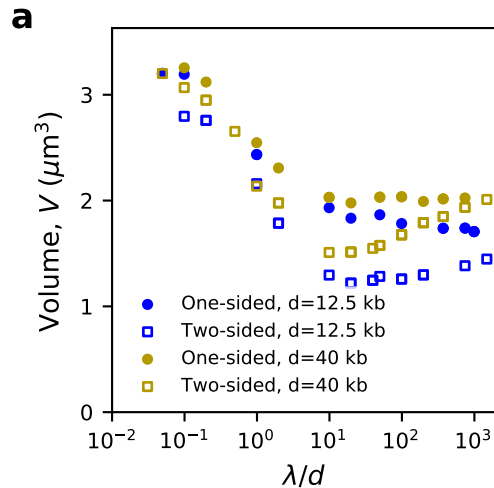

## Segregation

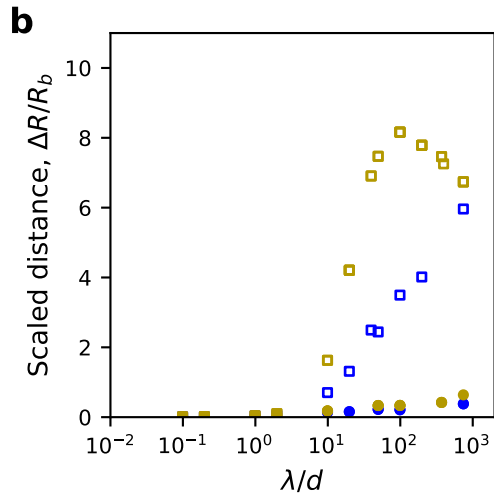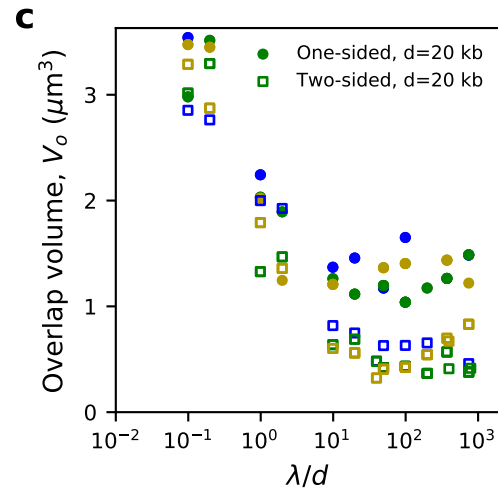

Supplement: supp [file elife-53558-supp-v1.zip › elife_poa_e53558_Figure_2_figure_supplement_1.pdf]

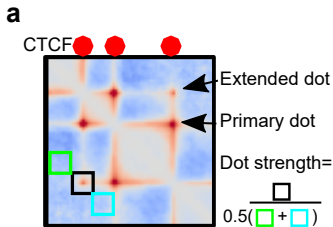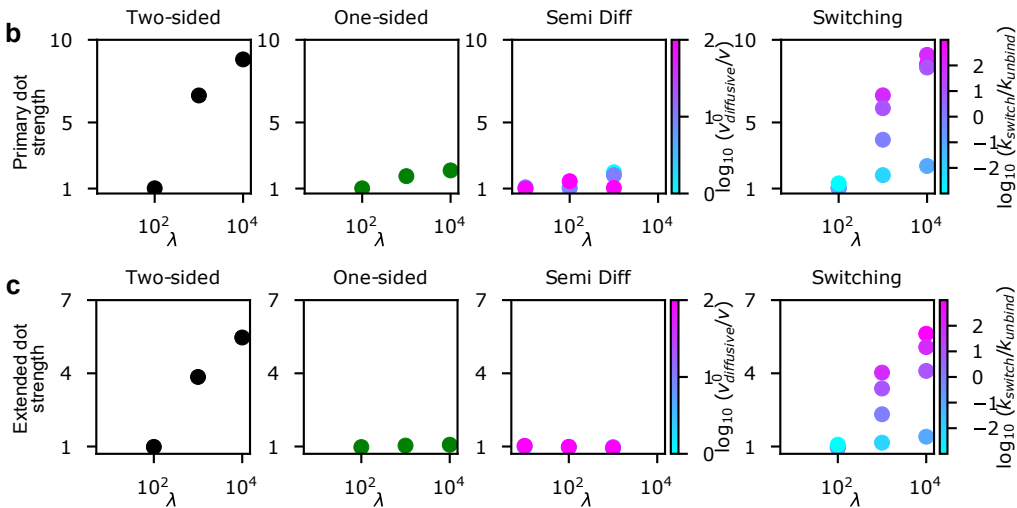

Supplement: supp [file elife-53558-supp-v1.zip › elife_poa_e53558_Figure_3_figure_supplement_2.pdf]

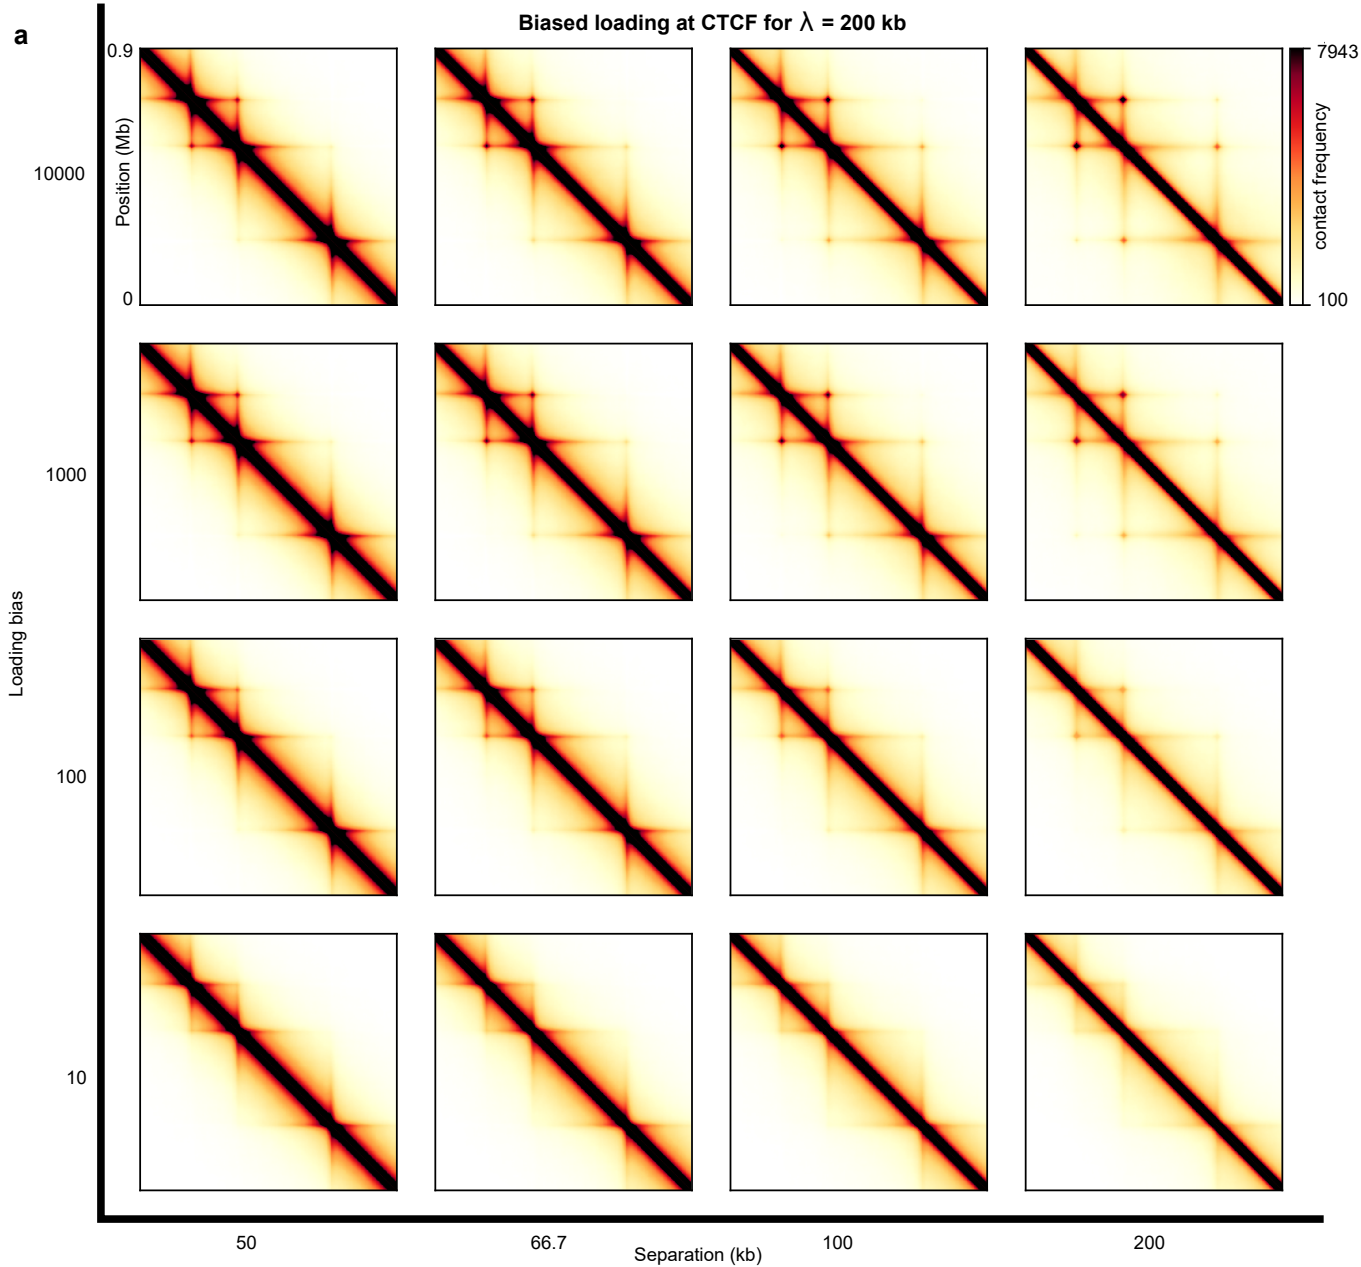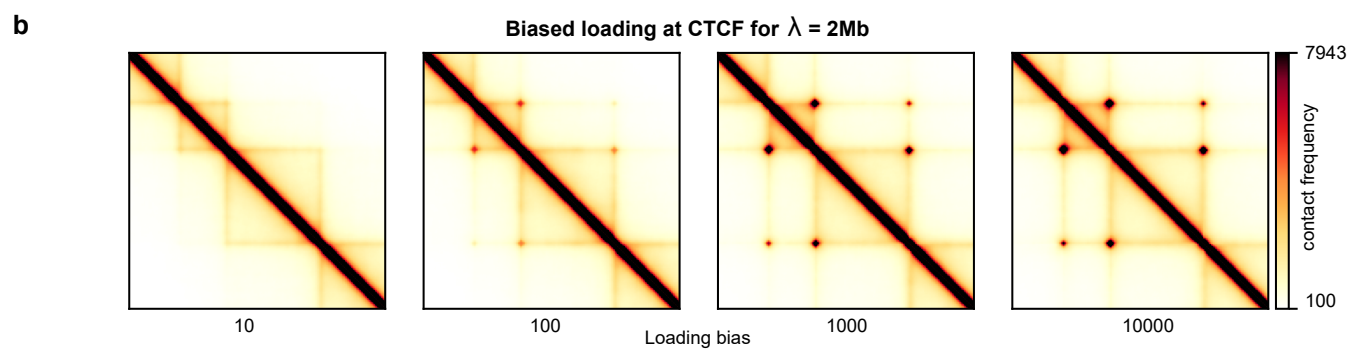

Supplement: supp [file elife-53558-supp-v1.zip › elife_poa_e53558_Figure_3_figure_supplement_6.pdf]

## Semi-diffusive model, with and without loop entropy

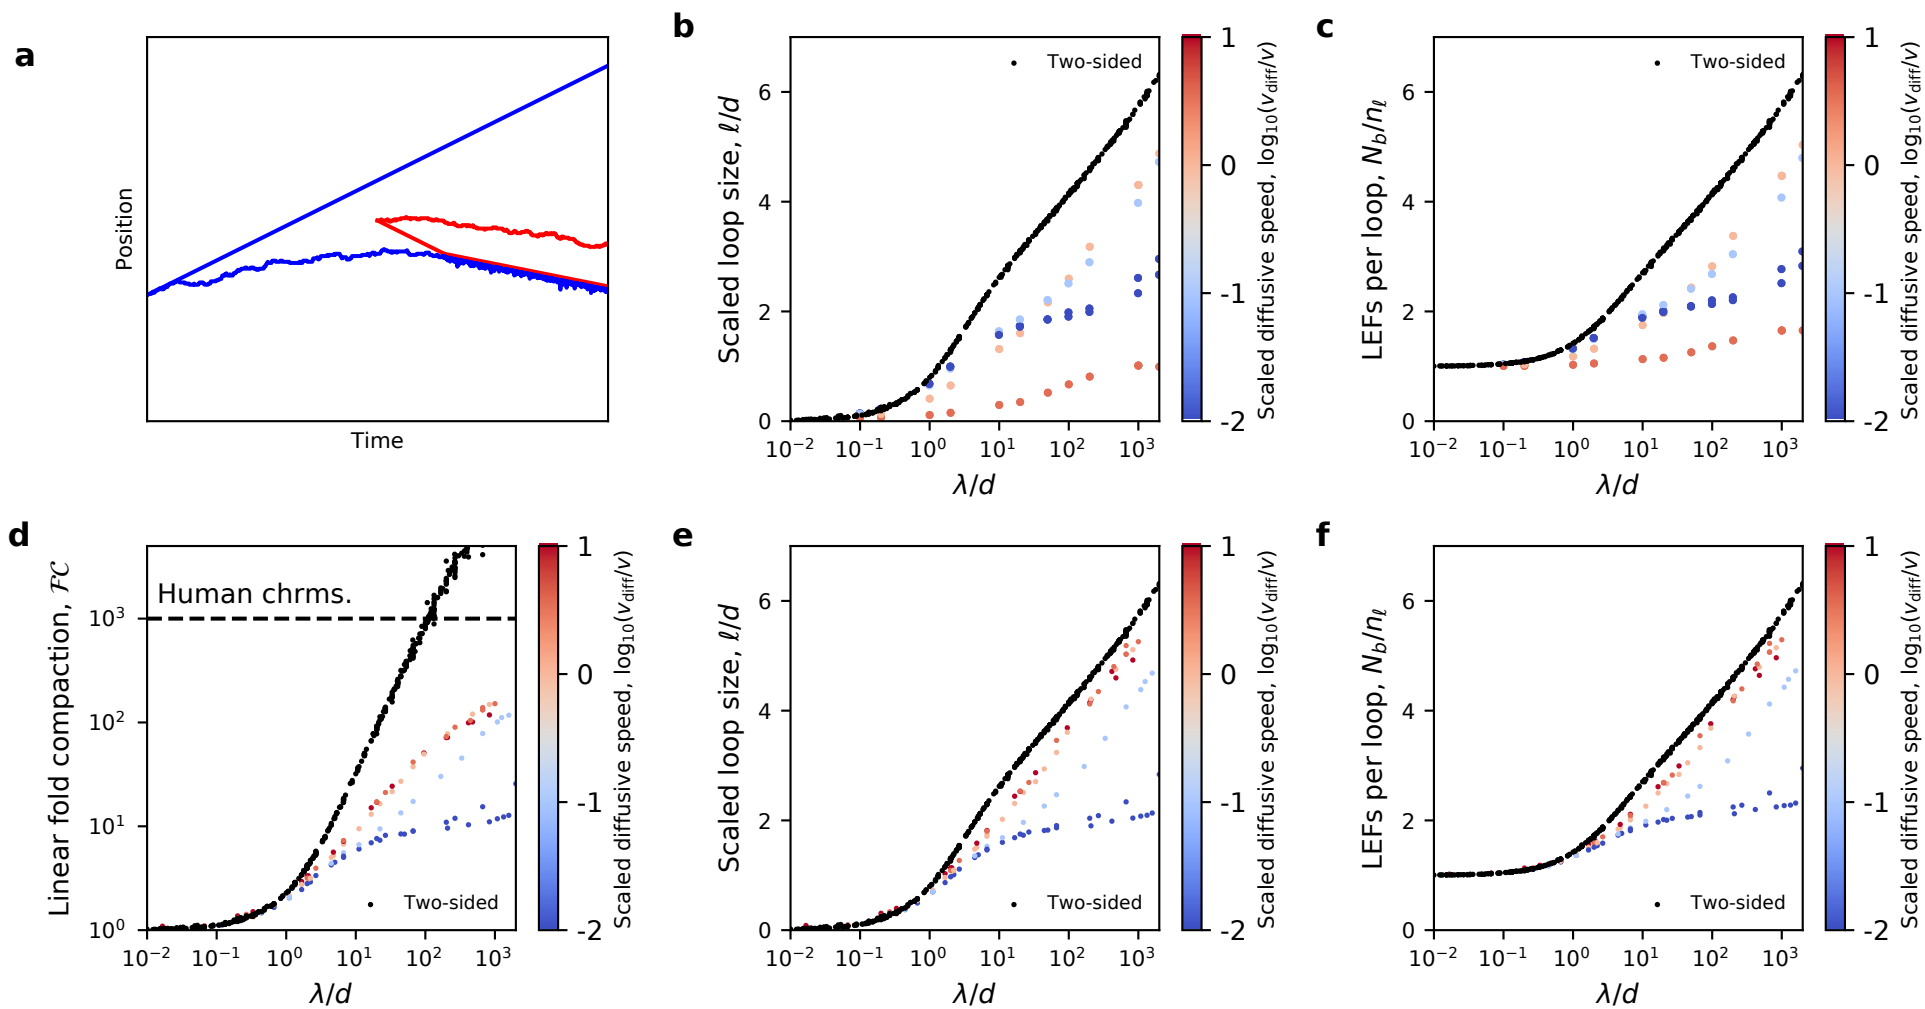

Supplement: supp [file elife-53558-supp-v1.zip › elife_poa_e53558_Figure_2_figure_supplement_3.pdf]

Mixing of pure one-sided and two-sided extruders

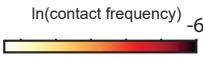

Percent one-sided:      0%                      5%                      10%                      20%                      50%

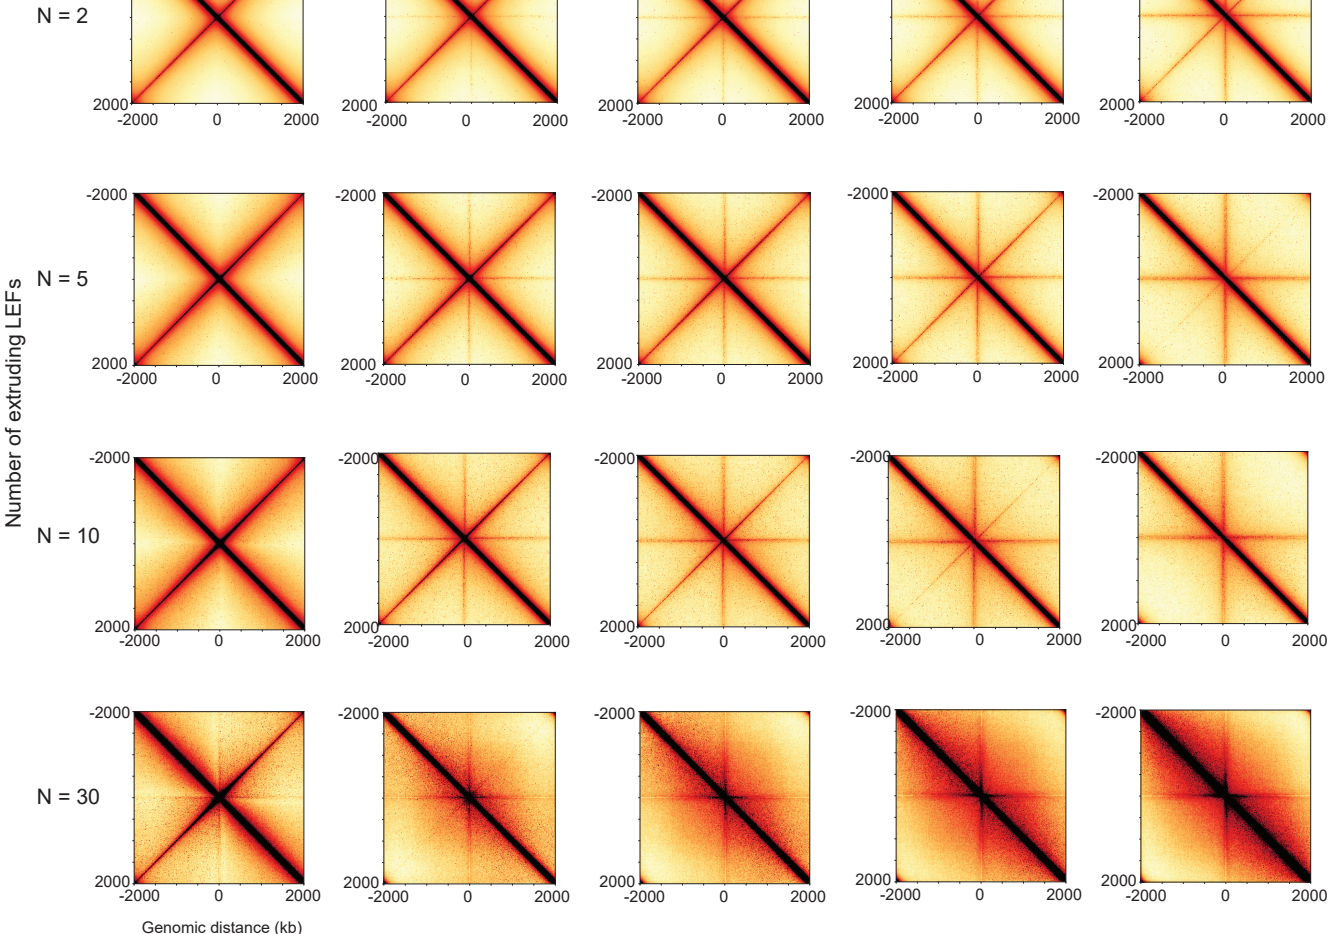

Supplement: supp [file elife-53558-supp-v1.zip › elife_poa_e53558_Figure_4_figure_supplement_3.pdf]

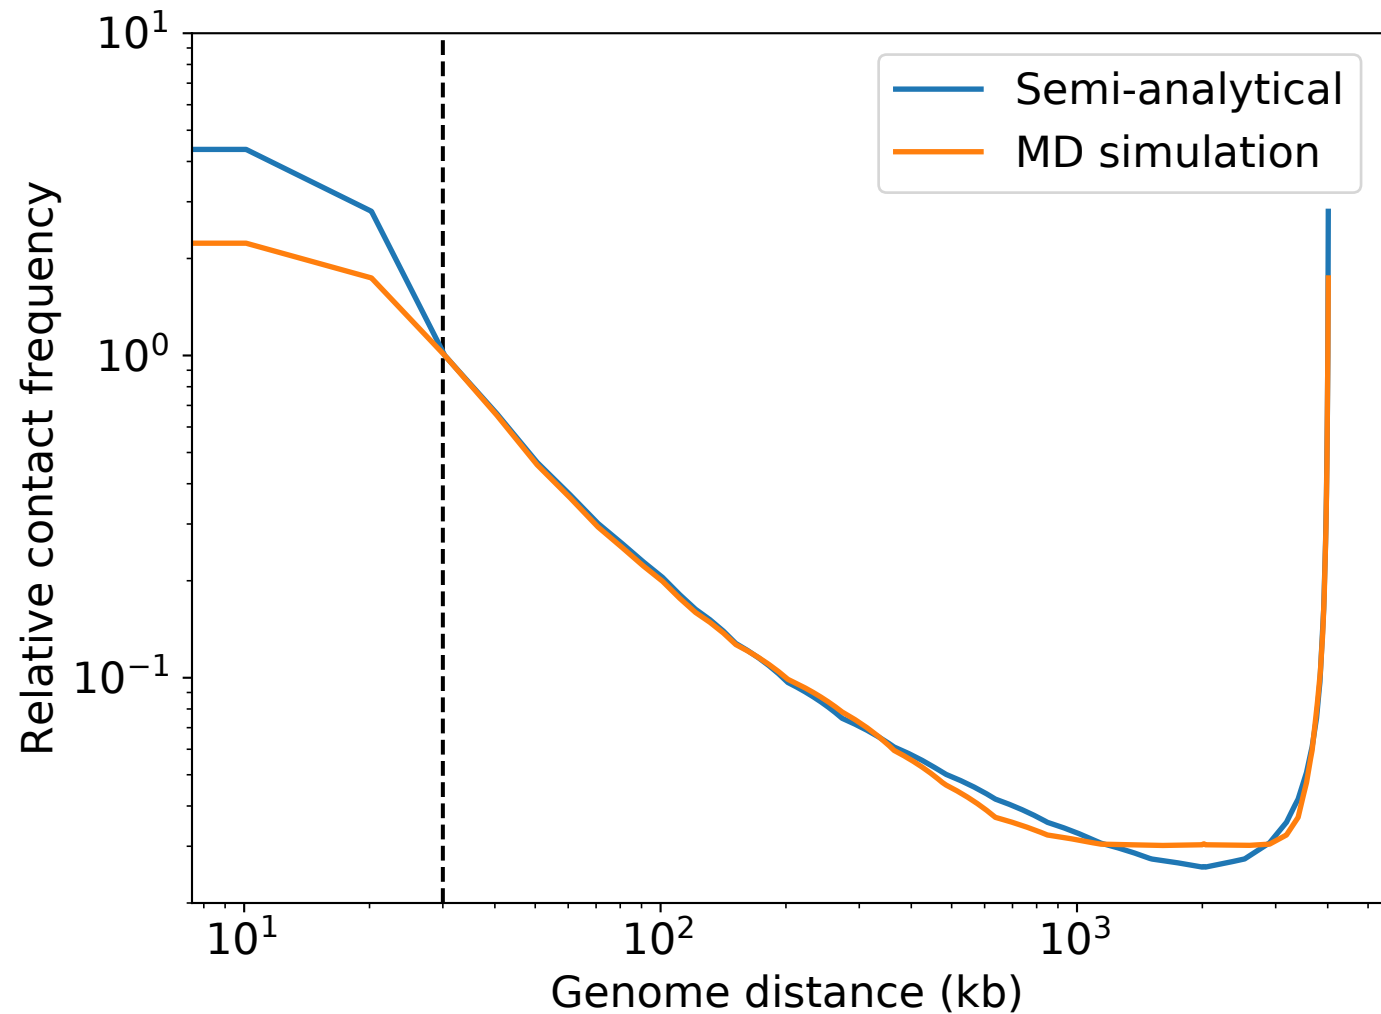

Supplement: supp [file elife-53558-supp-v1.zip › elife_poa_e53558_Figure_4_figure_supplement_8.pdf]

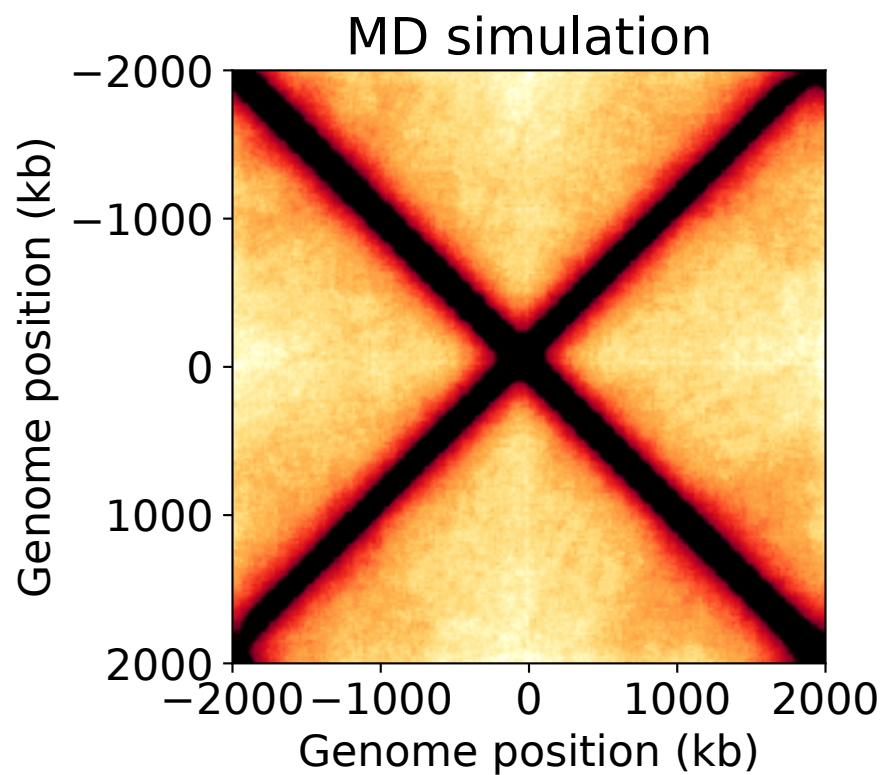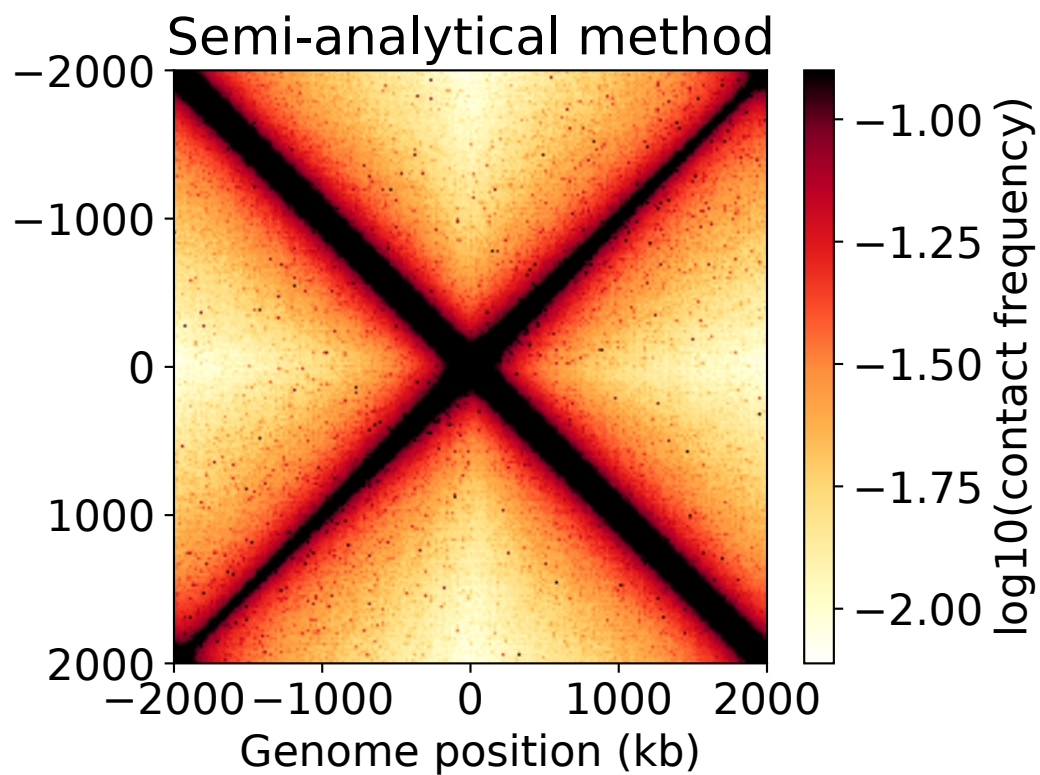

Supplement: supp [file elife-53558-supp-v1.zip › elife_poa_e53558_Figure_4_figure_supplement_7.pdf]

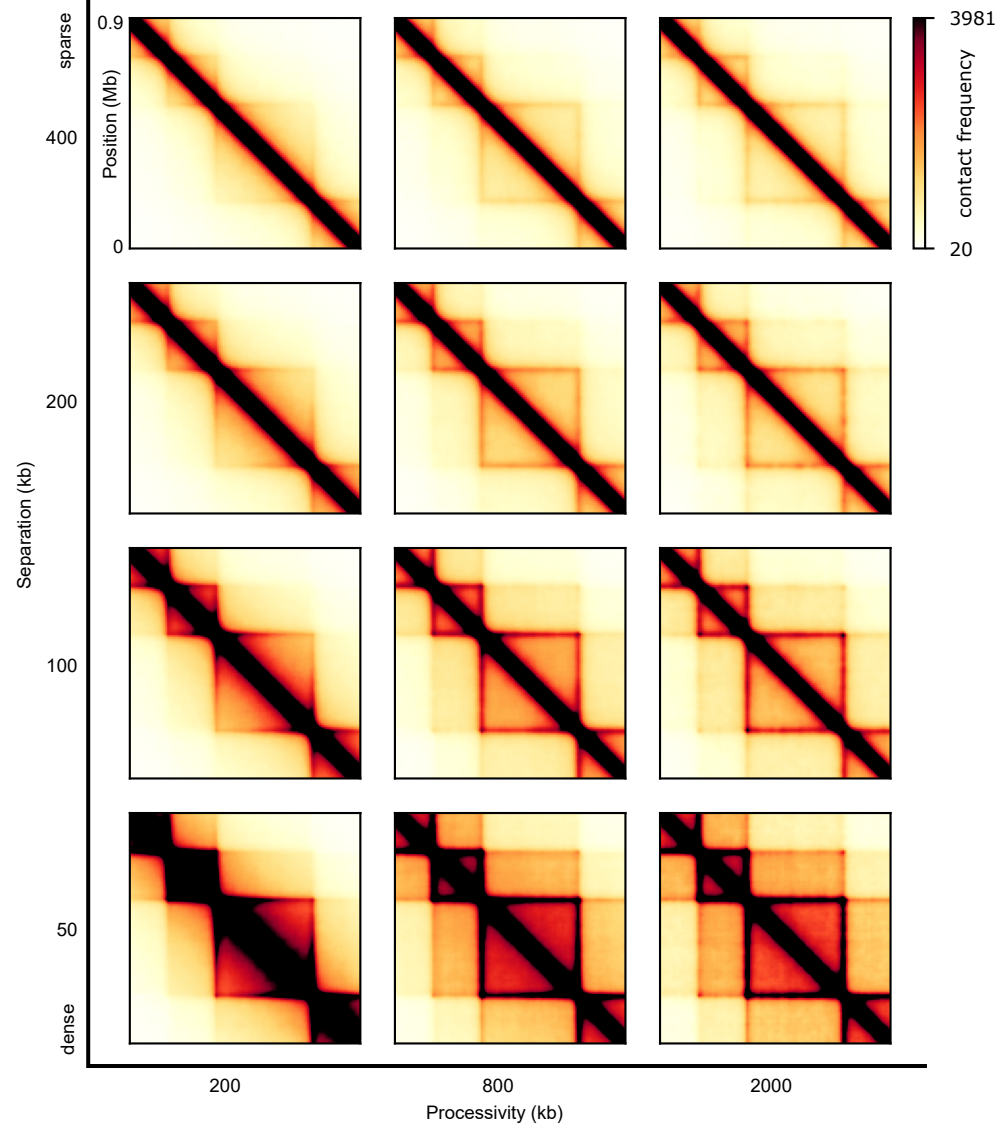

Supplement: supp [file elife-53558-supp-v1.zip › elife_poa_e53558_Figure_3_figure_supplement_7.pdf]

**a**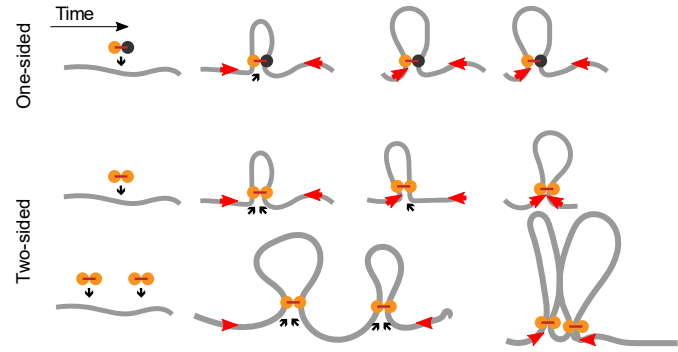**b**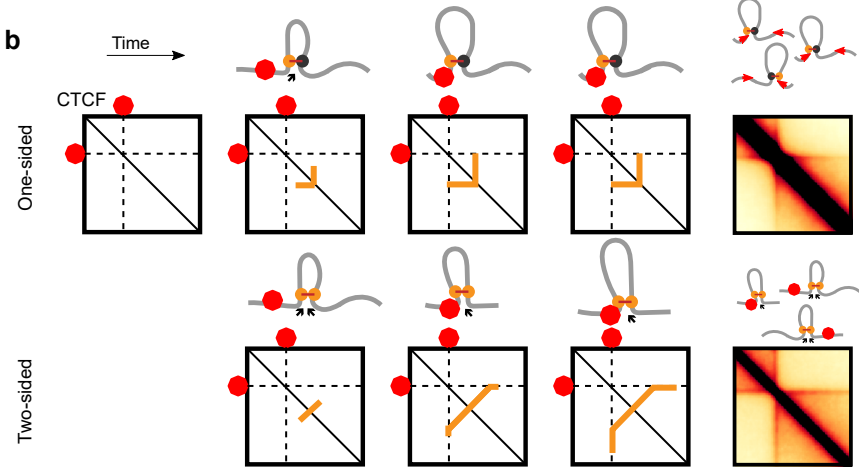

Supplement: supp [file elife-53558-supp-v1.zip › elife_poa_e53558_Figure_3_figure_supplement_3.pdf]

1-sided LEFs with traversal

Number  
of LEFs:  
N=5

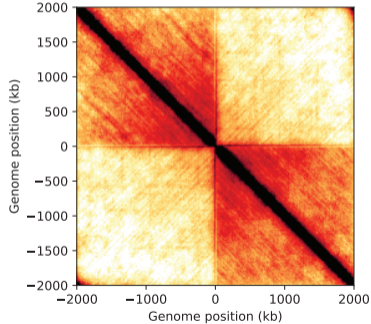

N=30

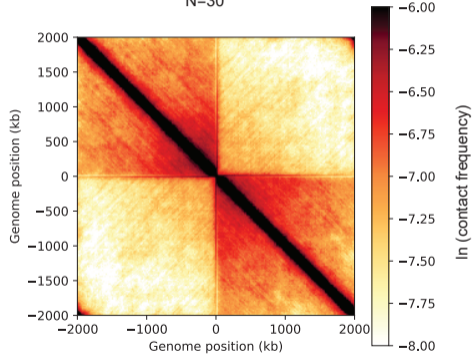

Supplement: supp [file elife-53558-supp-v1.zip › elife_poa_e53558_Figure_4_figure_supplement_5.pdf]

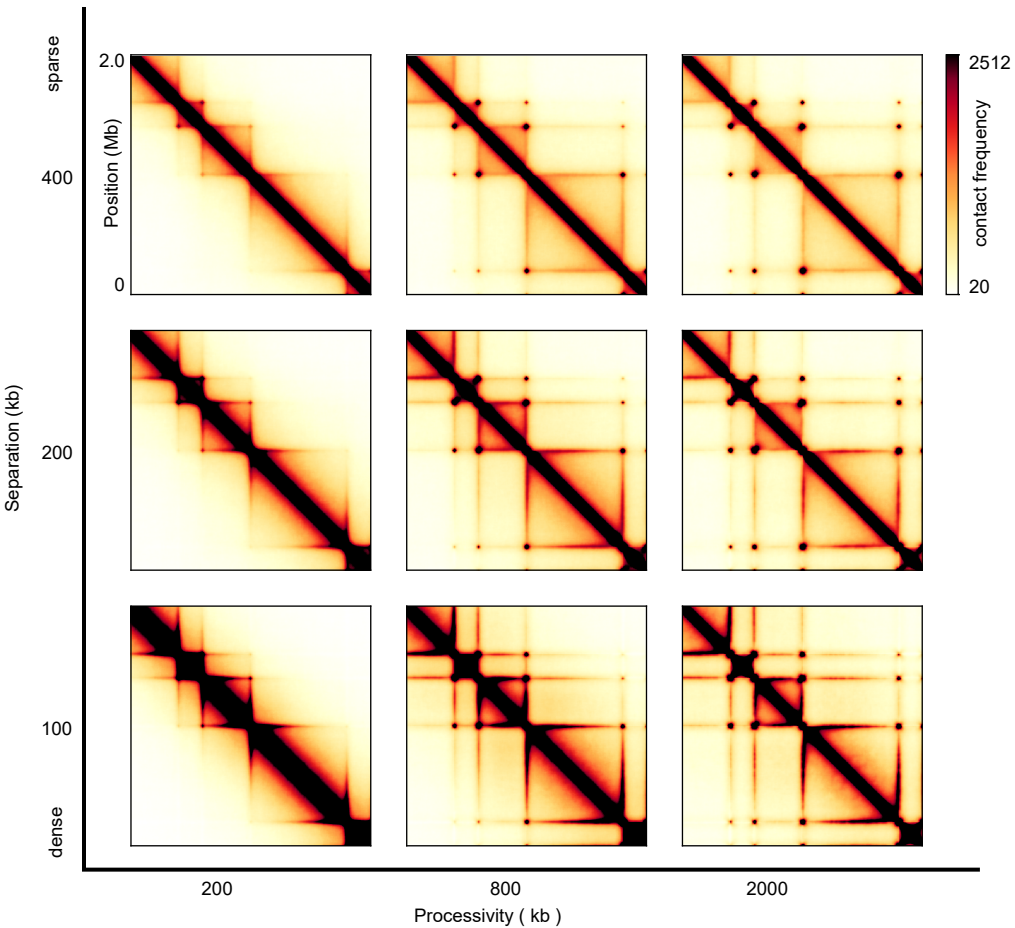

Supplement: supp [file elife-53558-supp-v1.zip › elife_poa_e53558_Figure_3_figure_supplement_5.pdf]

## Models with altered LEF residence times

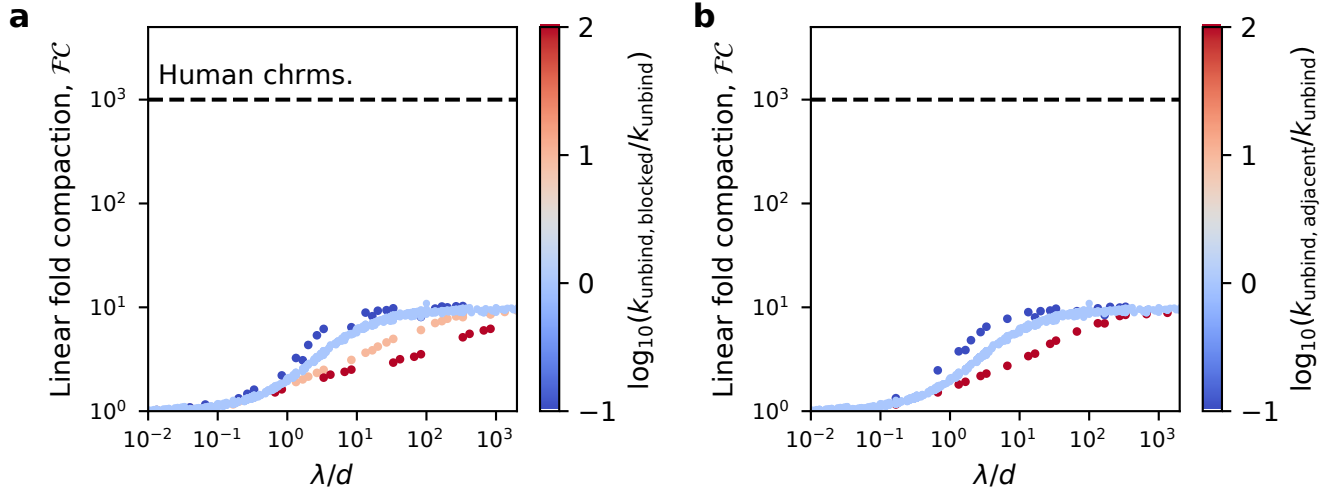

Supplement: supp [file elife-53558-supp-v1.zip › elife_poa_e53558_Figure_2_figure_supplement_6.pdf]

**a**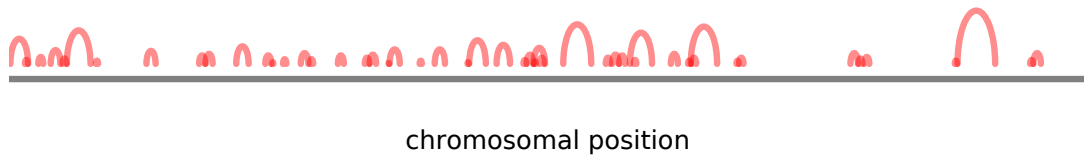**b**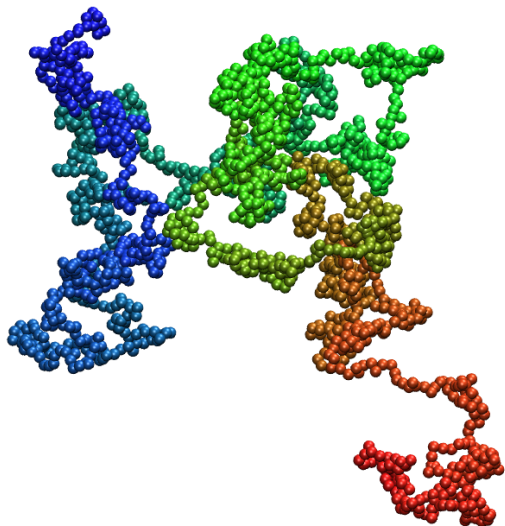**c**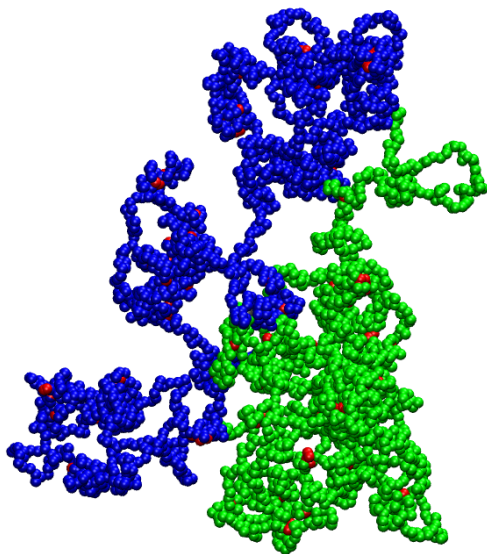

Supplement: supp [file elife-53558-supp-v1.zip › elife_poa_e53558_Figure_2_figure_supplement_7.pdf]

# Models with active pushing

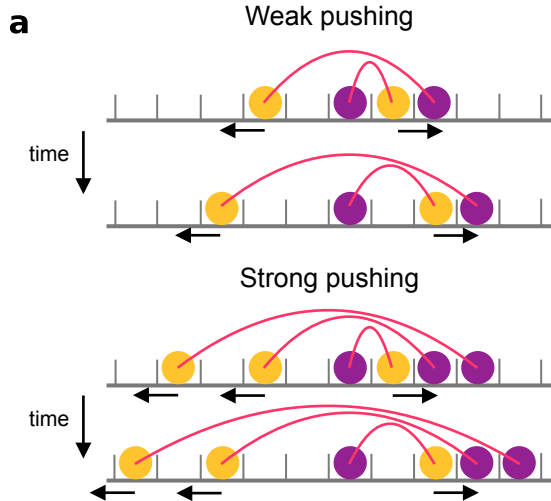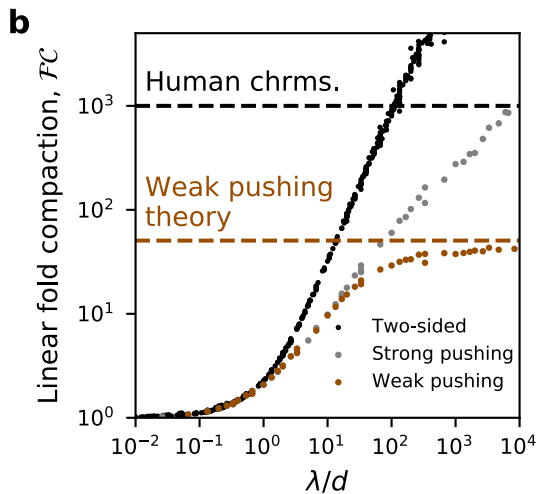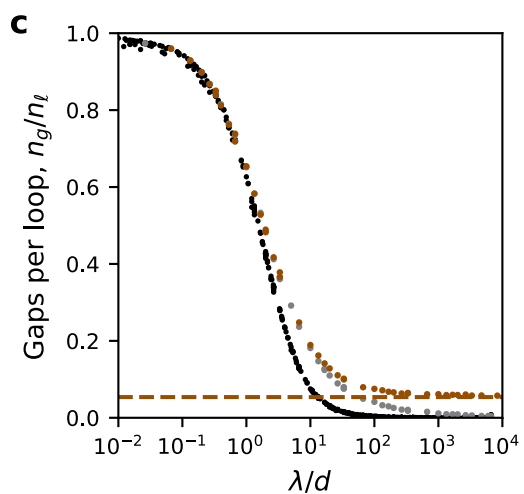

Supplement: supp [file elife-53558-supp-v1.zip › elife_poa_e53558_Figure_3_figure_supplement_4.pdf]
